# Supplementary material for: Deciphering the Immune Microenvironment on A Single Archival Formalin-Fixed Paraffin-Embedded Tissue Section by An Immediately Implementable Multiplex Fluorescence Immunostaining Protocol
Source: MDPI journal article supplement (doi:10.3390/cancers12092449), 2020-08-28
Supplement: s1 [file s1]

*Supplementary Materials*

# Deciphering the Immune Microenvironment on A Single Archival Formalin-Fixed Paraffin-Embedded Tissue Section by An Immediately Implementable Multiplex Fluorescence Immunostaining Protocol

Adrien Guillot, Marlene Sophia Kohlhepp, Alix Bruneau, Felix Heymann and Frank Tacke

## Supplementary Notes

**Note S1:** An intense and clear DAPI staining was key to image alignment after sequential image acquisition in our set-up. Alternatives may be used, as long as there is a constant feature that allows for image alignment across the experiment.

**Note S2:** In rare cases, if antibody elution was not efficient (e.g., very strong signal from the previous cycle) an additional stripping cycle may be performed.

**Note S3:** To prevent any issue due to residual staining and to verify antibody stripping, immunostaining expected to colocalize shall not be performed in two consecutive cycles using the same secondary antibody.

**Note S4:** After the last cycle of sequential fluorescent immunostaining, brightfield tissue staining may be performed. We have regularly stained the slides with Hematoxylin-Eosin and Trichrome Masson.

**Note S5:** Autofluorescence or any “targeted” image alterations must be done with extreme rigorosity and raw pictures should be shown beside.

**Note S6:** Image alignment and tissue integrity over repeated staining cycles may be checked by merging consecutive DAPI pictures (Figures S2, and S5b).

**Note S7:** CellProfiler benefits from a very active and supportive community, and a considerable amount of information may be found online (<https://cellprofiler.org/>).

**Note S8:** We chose to use FIJI, Ilastik and CellProfiler for their diverse plugins, extensive support communities and ease of use. A number of very valuable open source and commercial alternatives are available [1–5].

**Note S9:** Download the latest version of CellProfiler at this link: <https://cellprofiler.org/releases>, and older releases at: <https://cellprofiler.org/previous-releases>. We ran the provided CellProfiler projects on version 3.1.9. After installing the software, go to File > Open project, and select the appropriate cproj file (Appendix A or Appendix B).

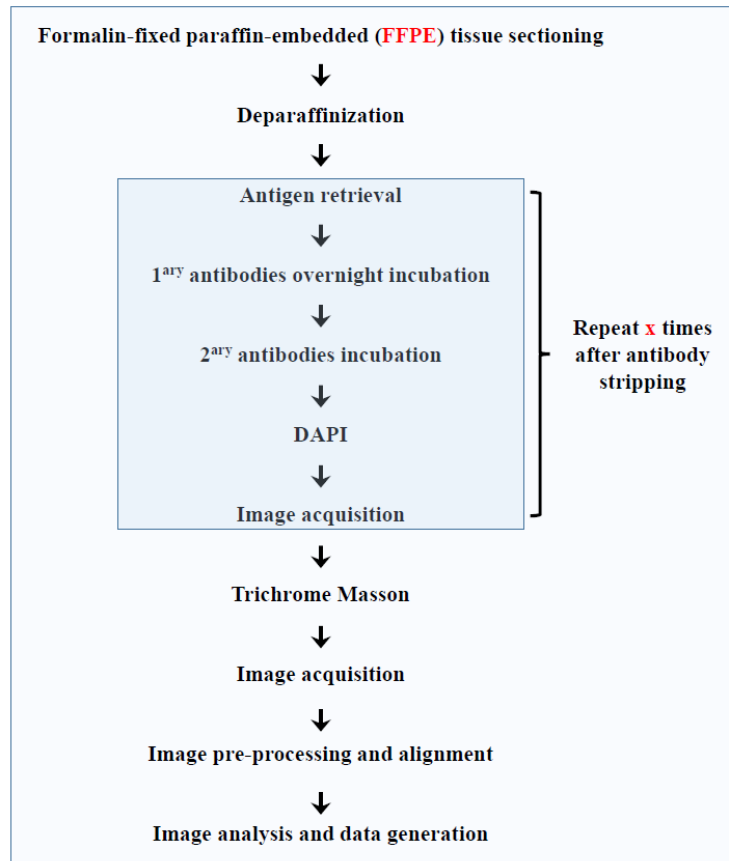

**Figure S1.** General workflow for multiplex immunostaining and data generation. This chart depicts the generic workflow one can apply from tissue collection to data generation.

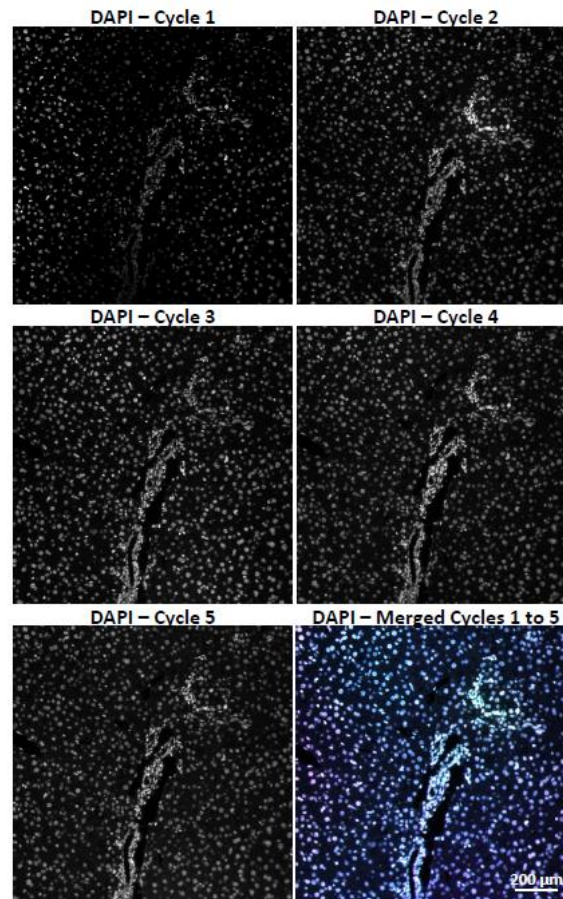

**Figure S2: Multiple cycles of immunostaining do not damage the tissue, and DAPI may be used for image alignment**

**Figure S2.** Multiple cycles of immunostaining do not damage the tissue, and DAPI may be used for image alignment. A single FFPE mouse liver section has been subjected to multiple cycles of stripping and immunostaining as depicted in Figure S1. At each cycle, DAPI image was recorded. At the end of the experiment, all DAPI pictures were aligned and merged together using FIJI (bottom right panel).

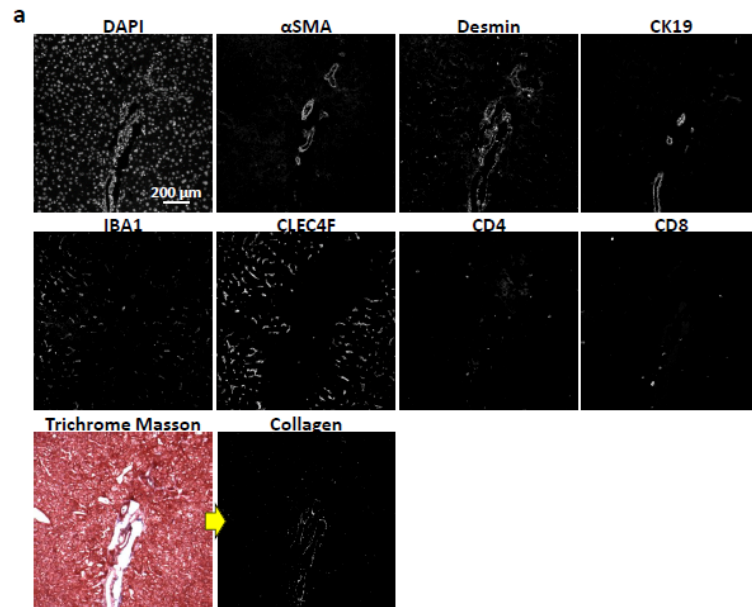

Figure S3a: Single channel pictures from Figure 1a

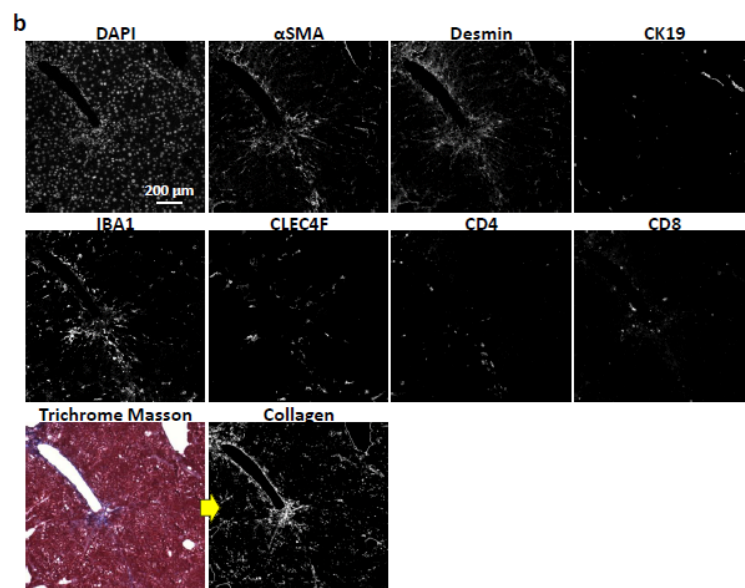

Figure S3b: Single channel pictures from Figure 1a

**Figure S3.** Single channel pictures from Figure 1a. **(a)** Healthy control mouse liver and **(b)**  $\text{CCl}_4$  injected. Single immunostaining pictures are depicted in grayscale. The collagen staining (dark blue) from the Trichrome Masson was extracted using FIJI.

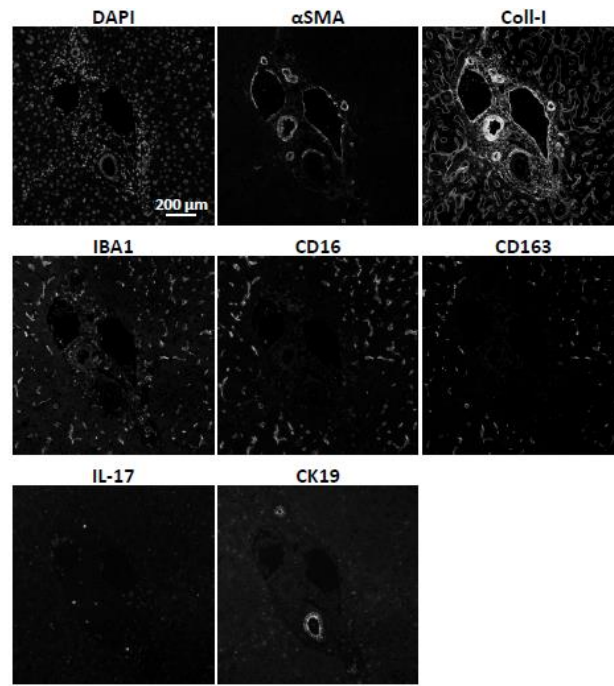

Figure S4a: Single channel pictures from Figure 1b

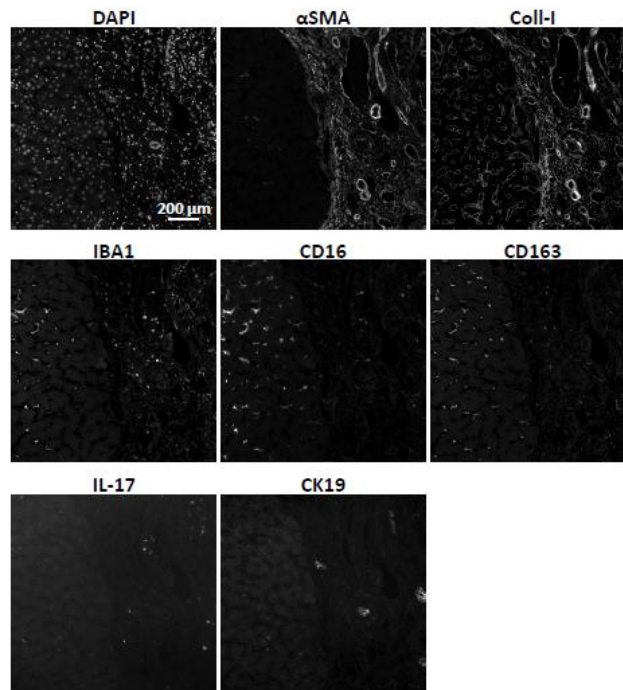

Figure S4b: Single channel pictures from Figure 1b

**Figure S4.** Single channel pictures from Figure 1b. (a) Healthy human liver and (b) liver resection from a patient suffering from primary sclerosing cholangitis. Single immunostaining pictures are depicted in grayscale. In this Figure, collagen staining was obtained by using a primary antibody directed against type I collagen.



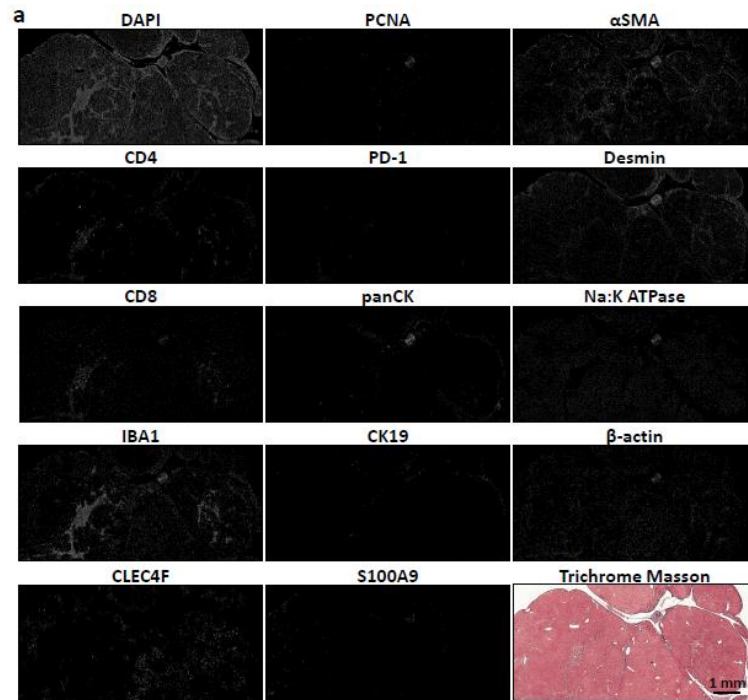

Figure S5a: Multiplex immunostaining combined with large area scanning

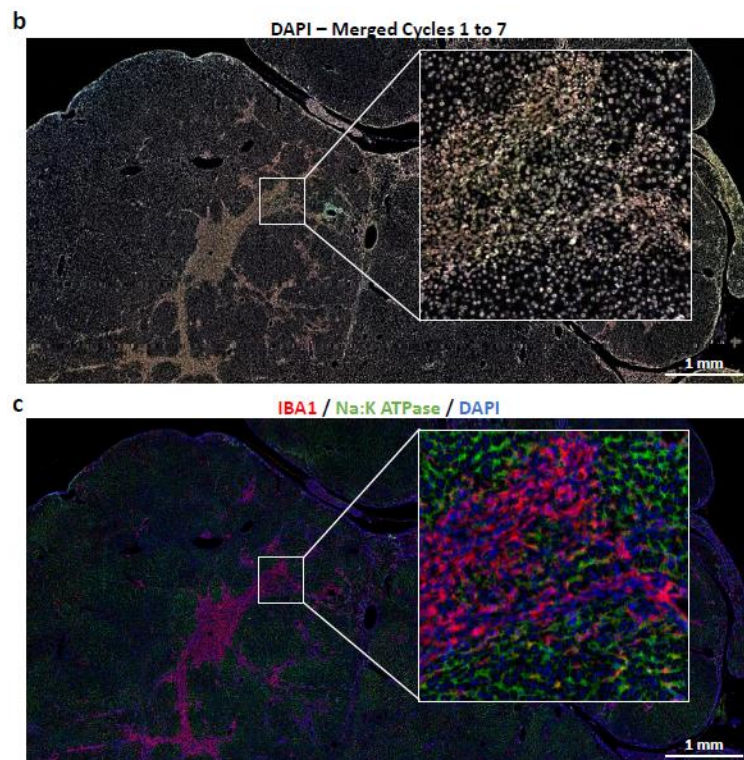

Figure S5b, c: Multiplex immunostaining combined with large area scanning

**Figure S5.** Multiplex immunostaining combined with large area scanning. (a) Single immunostaining pictures from Figure. 2a,b. (b) DAPI acquired images from 7 immunostaining cycles were merged together. Insert shows an enlarged area. (c) IBA1 (red), Na:K ATPase (green) and DAPI (blue) pictures were merged.

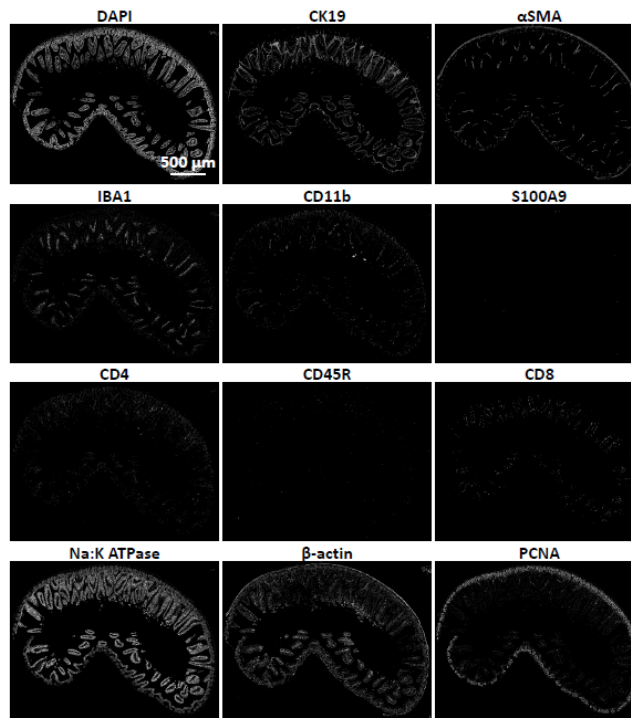

Figure S6a: Single channel pictures from Figure 3a

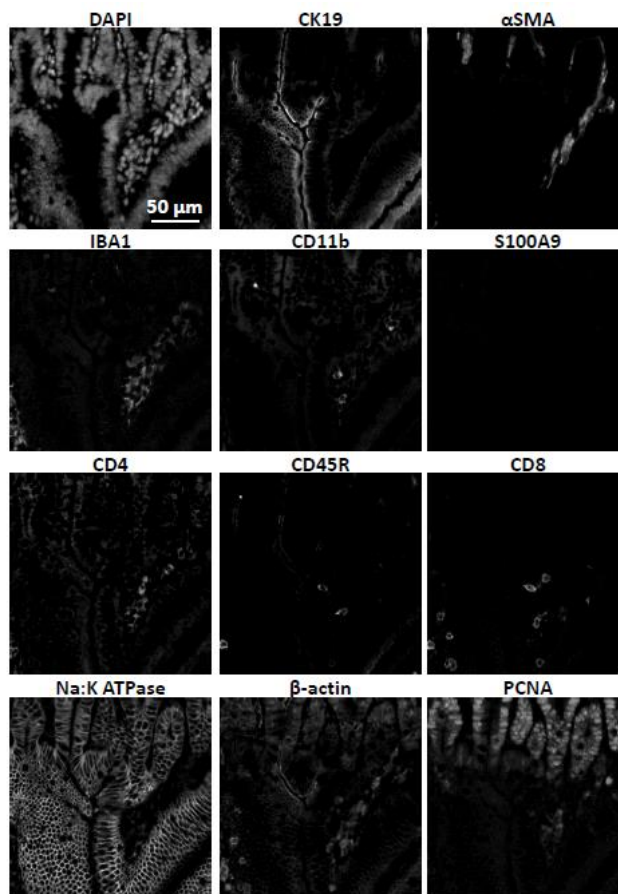

Figure S6b: Single channel pictures from Figure 3a

**Figure S6.** Single channel pictures from Figure. 3a. Single immunostaining pictures from (a) the whole scanned area or (b) an enlarged area, are depicted in grayscale.

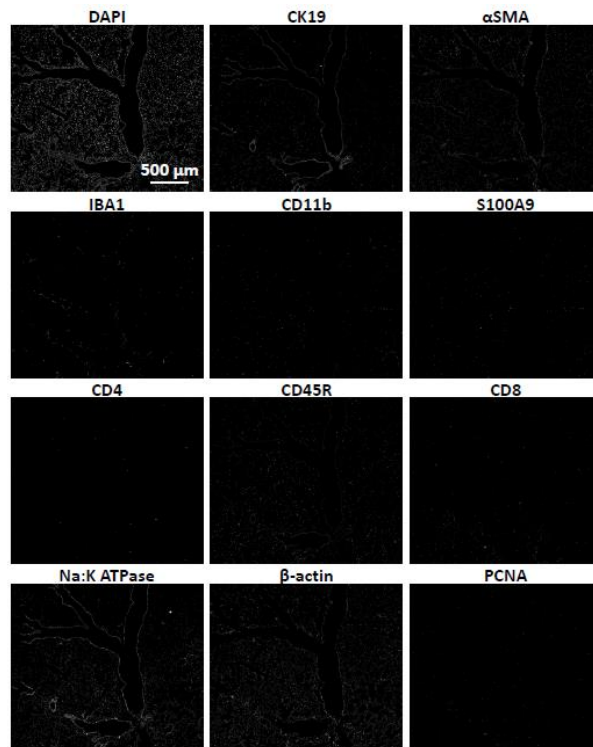

Figure S7a: Single channel pictures from Figure 3b

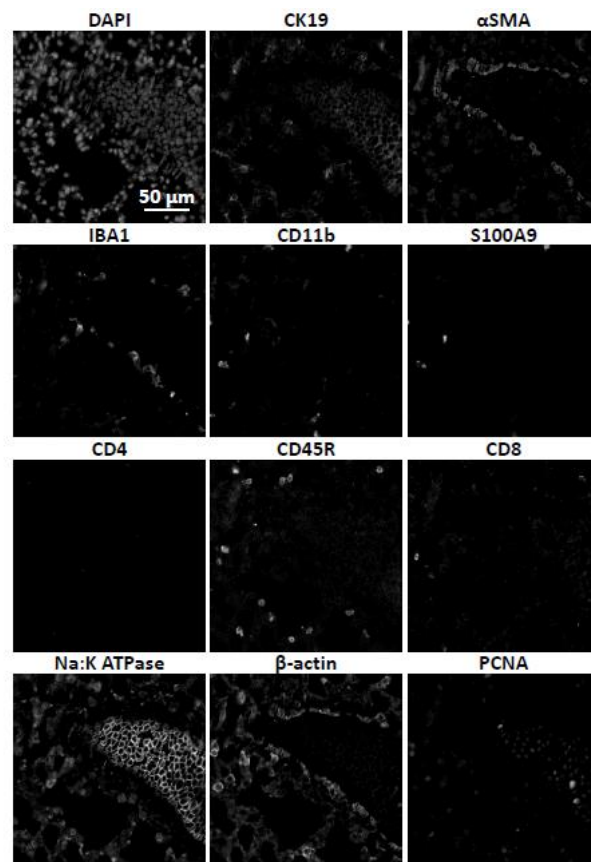

Figure S7b: Single channel pictures from Figure 3b

**Figure S7.** Single channel pictures from Figure 3b. Single immunostaining pictures from (a) the whole scanned area or (b) an enlarged area, are depicted in grayscale.



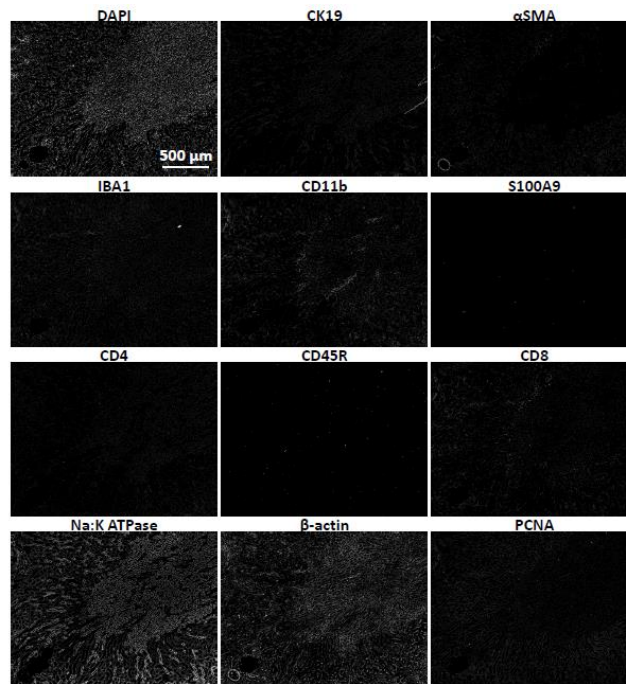

Figure S8a: Single channel pictures from Figure 3c

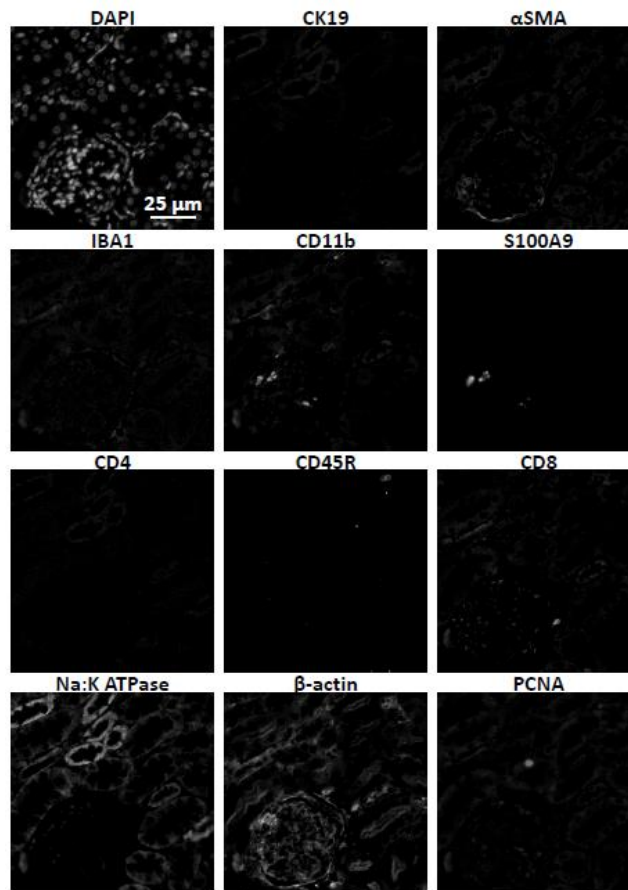

Figure S8b: Single channel pictures from Figure 3c

**Figure S8.** Single channel pictures from Figure. 3c. Single immunostaining pictures from (a) the whole scanned area or (b) an enlarged area, are depicted in grayscale.

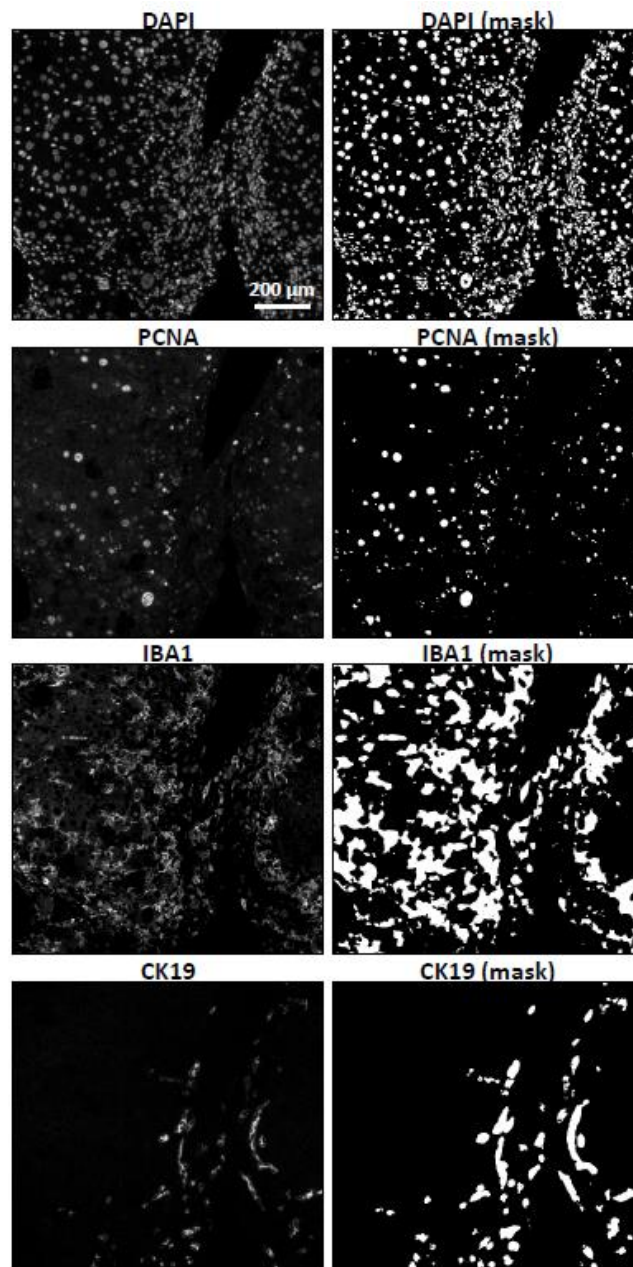

**Figure S9: Image processing steps used in Figure 4**

**Figure S9.** Image processing steps used in Figure 4. Single immunostaining pictures are depicted in grayscale (left panels). Corresponding masks generated by using Ilastik are shown in the right panels.

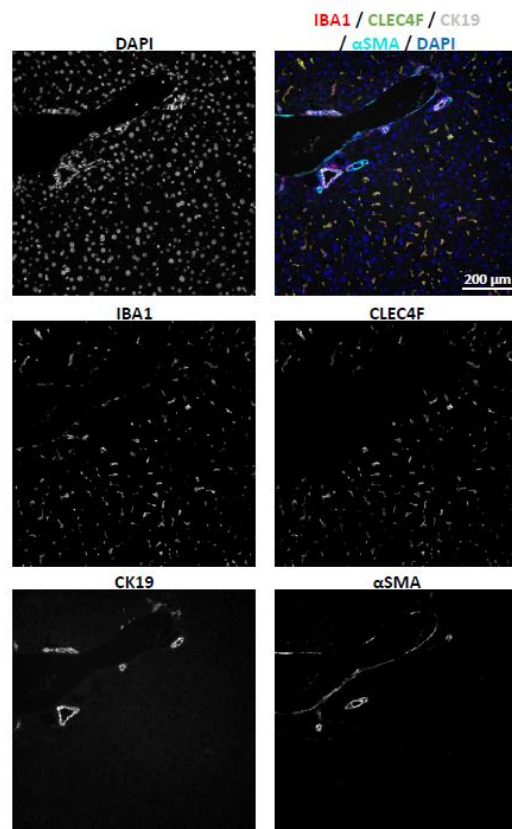

Figure S10a: Single channel pictures from Figure 5a

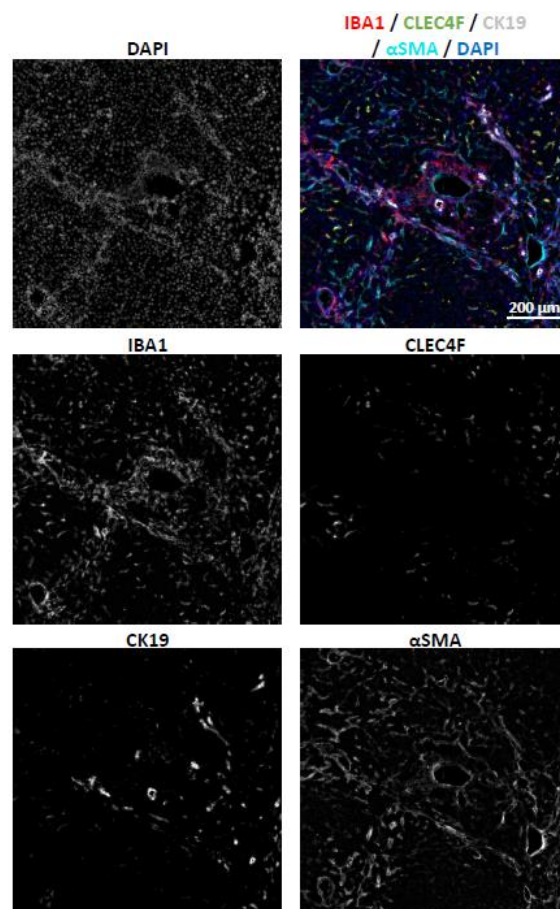

Figure S10b: Single channel pictures from Figure 5a

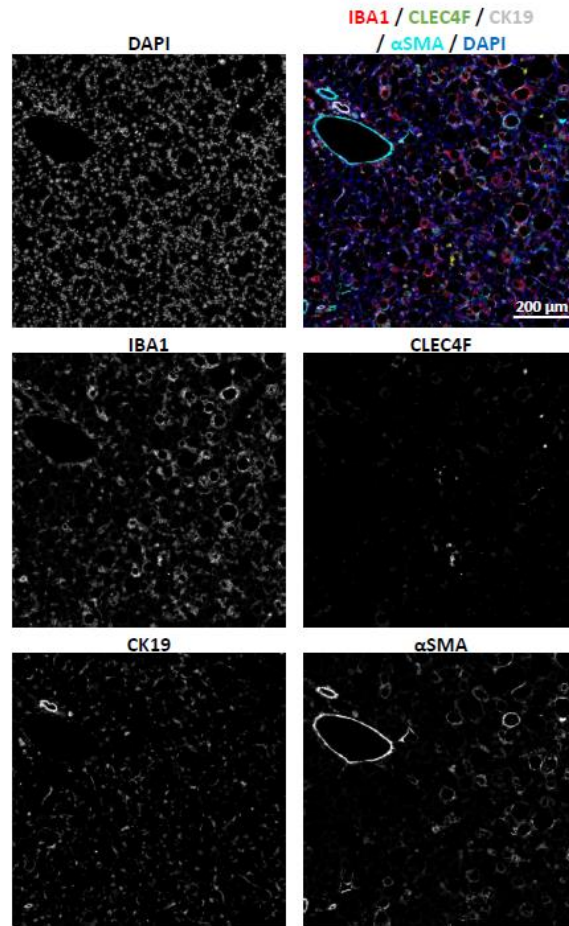

**Figure S10c:** Single channel pictures from Figure 5a

**Figure S10.** Single channel pictures from Figure 4g. Single immunostaining pictures from (a) healthy, (b) DEN and CCl<sub>4</sub> injected, and (c) CDAHFD fed mice, are depicted in grayscale.



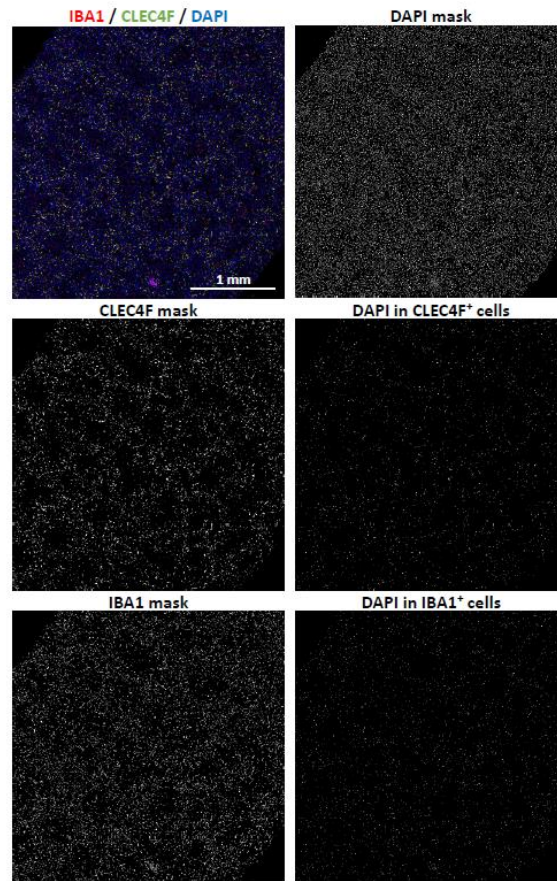

Figure S11a: Masks used for cell density map

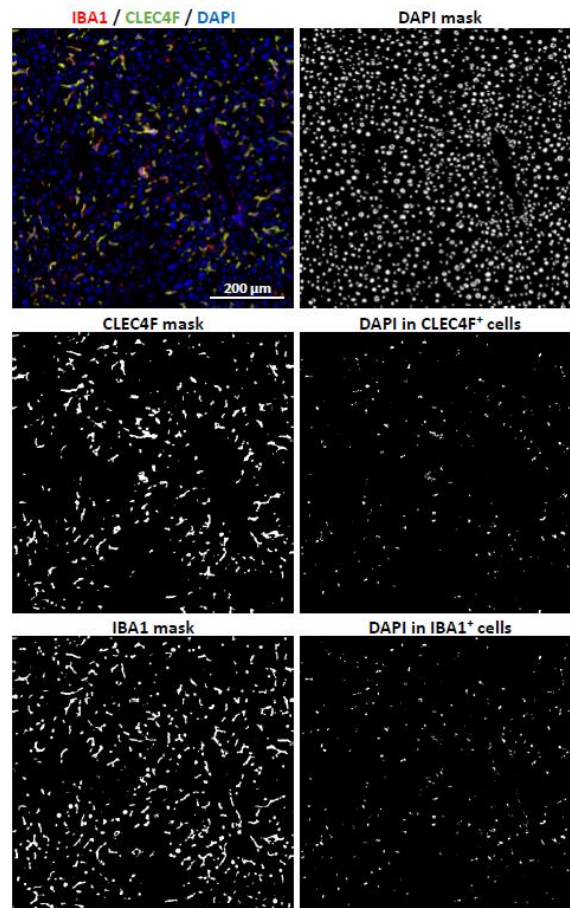

Figure S11b: Masks used for cell density map

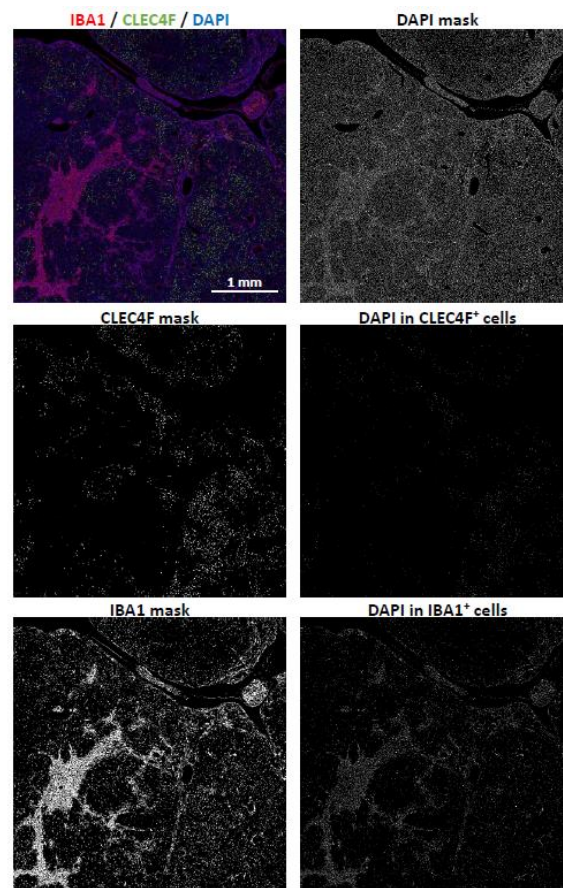

Figure S11c: Masks used for cell density map

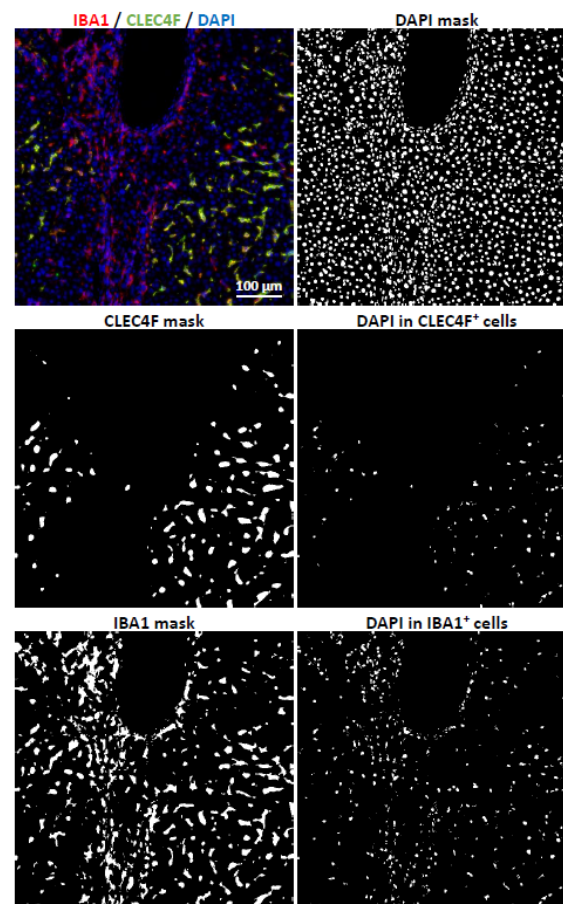

Figure S11d: Masks used for cell density map



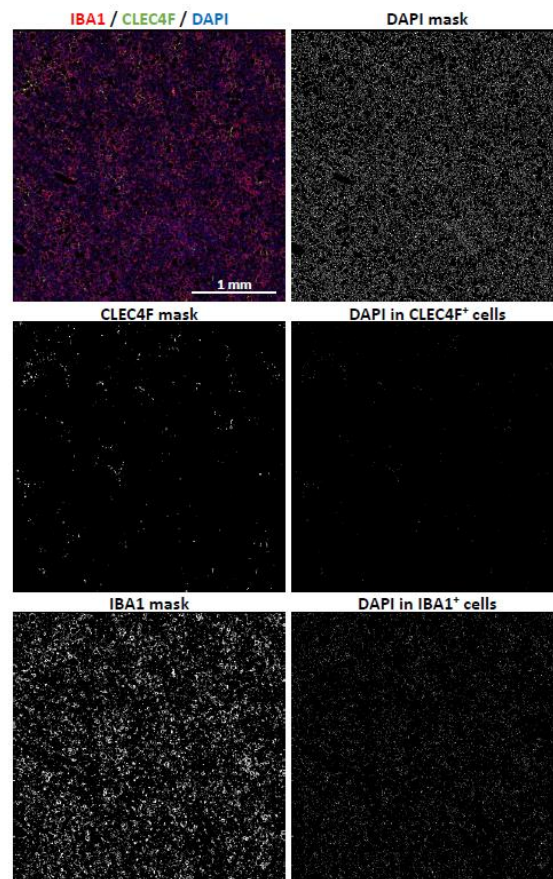

Figure S11e: Masks used for cell density map

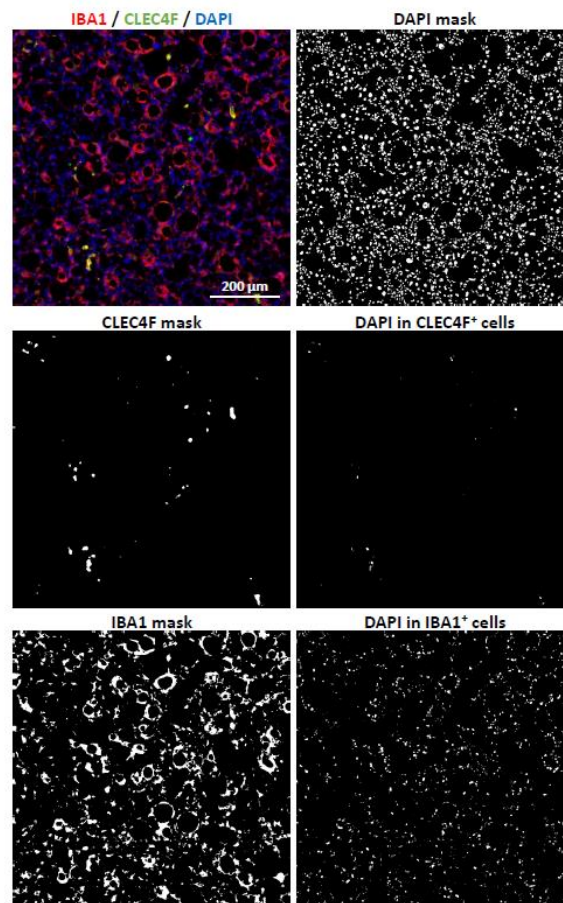

Figure S11f: Masks used for cell density map

**Figure S11.** Masks used for cell density map. Masks for DAPI, CLEC4F and IBA1 staining applied to generate the data depicted in Figure 5b–d were obtained using Ilastik. IBA1 and CLEC4F masks were further applied to the DAPI mask in order to select the corresponding nucleus attributable to IBA1<sup>+</sup>CLEC4F<sup>+</sup> or IBA1<sup>+</sup>CLEC4F<sup>+</sup> expressing cells. (a,c,e) Whole scanned areas and (b,d,f) enlarged areas.

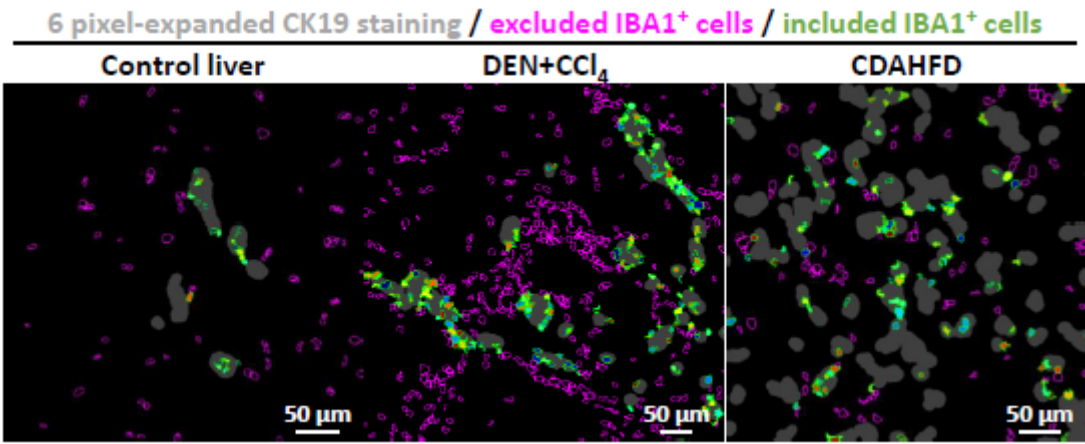

**Figure 12.** CK19<sup>+</sup> cell neighbor analysis. CellProfiler was used to quantify IBA1<sup>+</sup> cells in the CK19<sup>+</sup> cell neighborhood. A CK19-positive cell mask was generated using Ilastik, then expanded by 6 pixels in CellProfiler. This mask was applied on the IBA1<sup>+</sup>DAPI<sup>+</sup> objects identified as indicated in Figure S11. The expanded CK19 mask is shown in grey, IBA1<sup>+</sup> DAPI<sup>+</sup> cells present within 6 pixels from CK19<sup>+</sup> cells are depicted in green, and excluded IBA1<sup>+</sup>DAPI<sup>+</sup> cells in magenta.

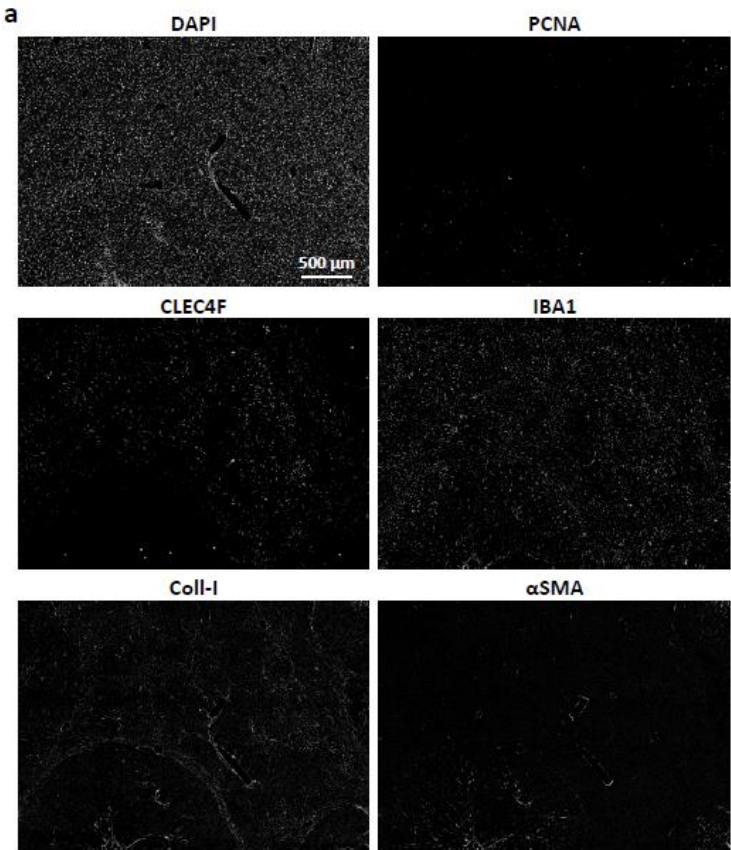

**Figure S13a:** Single channel pictures and masks used for tumor region analysis

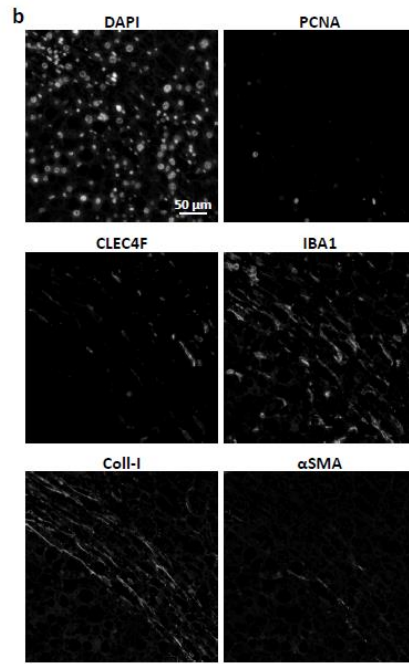

Figure S13b: Single channel pictures and masks used for tumor region analysis

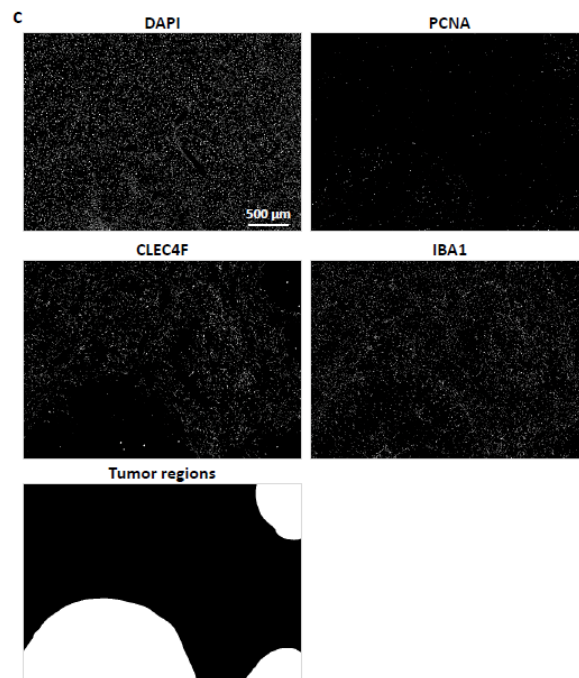

Figure S13c: Single channel pictures and masks used for tumor region analysis

**Figure S13.** Single channel pictures and masks used for tumor region analysis. **(a,b)** Single channel pictures from Figure 6a. **(c)** Masks used for cell numbering and tumor region analysis.

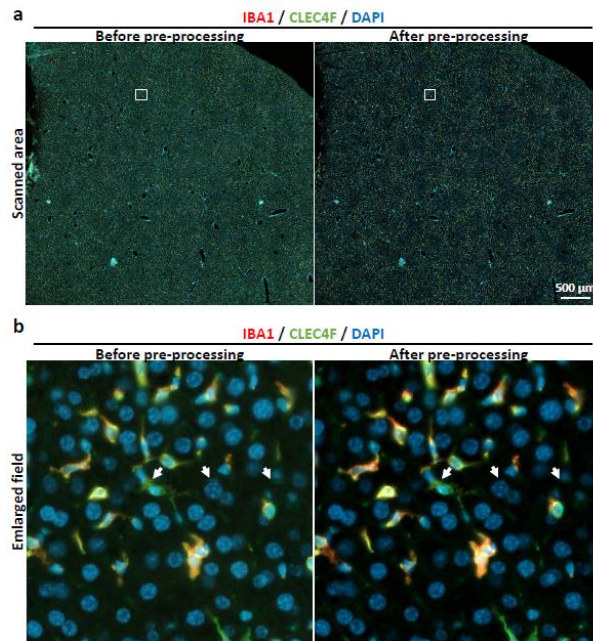

Figure S14: Stitching and background subtraction following large field scanning greatly enhance image quality

**Figure S14.** Stitching and background subtraction following large field scanning greatly enhance image quality. (a) Tile stitching and background subtraction were performed by using the ZEISS ZEN software on whole scanned areas after the acquisition of DAPI (blue), IBA1 (red) and CLEC4F (green) staining. (b) Enlarged area from the upper panel. White arrows indicate noticeable changes to the original pictures.

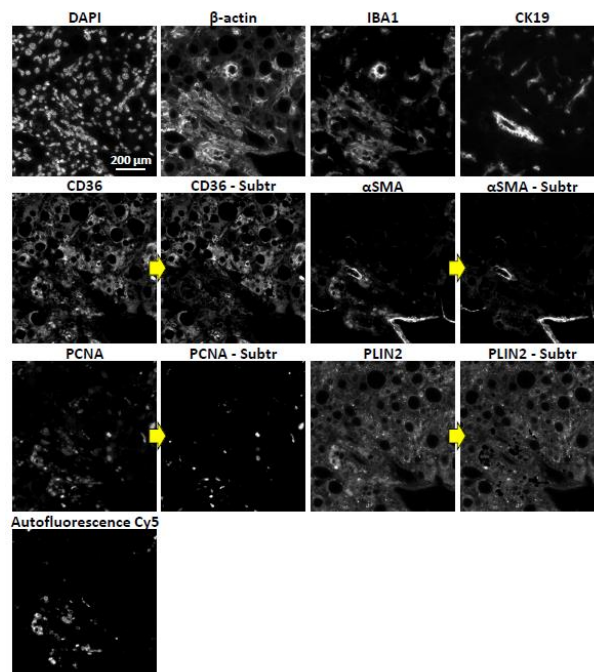

Figure S15a: Autofluorescence subtraction may enhance image quality



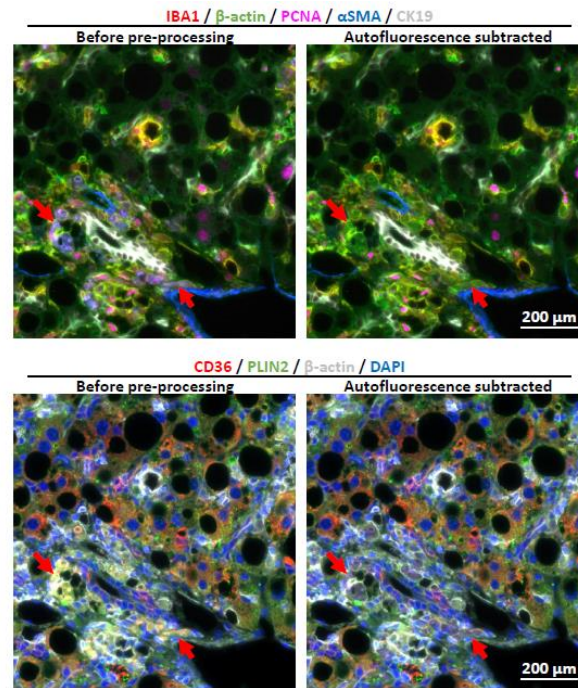

Figure S15b: Autofluorescence subtraction may enhance image quality

**Figure S15.** Autofluorescence subtraction may enhance image quality. (a) Single immunostaining pictures a CDAHFD fed mice, are depicted in grayscale. The autofluorescence acquired by using the Cy5 filter has been subtracted from the CD36,  $\alpha$ SMA, PCNA and PLIN2 images as indicated. (b) Color merges reveal the relevance of rigorous autofluorescence subtraction. Red arrows show areas in which the autofluorescence subtraction may alter the conclusions drawn from these immunostainings.

**Table S1:** Antibodies used in this study.

| Abbreviation Used<br>in This Report |                | Antigen Full Name                                             | Manufacturer and Catalog #                                                                 | Clone #    | Host<br>Species | Antibody Dilution<br>in PBS+1%BSA |
|-------------------------------------|----------------|---------------------------------------------------------------|--------------------------------------------------------------------------------------------|------------|-----------------|-----------------------------------|
| <b>Primary<br/>Antibodies</b>       | $\alpha$ SMA   | Alpha-smooth muscle actin                                     | Agilent #M085129-2                                                                         | 1A4        | Mouse           | 1:400                             |
|                                     | $\beta$ -actin | Beta-actin                                                    | Santa Cruz #sc-47778                                                                       | C4         | Mouse           | 1:200                             |
|                                     | CD4            | T-cell surface glycoprotein CD4                               | ThermoFisher #14-9766-82                                                                   | 4SM95      | Rat             | 1:200                             |
|                                     | CD8            | T-cell surface glycoprotein CD8 alpha chain                   | ThermoFisher #14-0808-82                                                                   | 4SM15      | Rat             | 1:200                             |
|                                     | CD11b          | Integrin alpha-M/beta-2                                       | Abcam #ab133357                                                                            | EPR1344    | Rabbit          | 1:1,000                           |
|                                     | CD16           | Low affinity immunoglobulin gamma Fc<br>region receptor III-A | Abcam #ab183354                                                                            | SP175      | Rabbit          | 1:500                             |
|                                     | CD36           | Adipocyte membrane protein                                    | Abcam #ab133625                                                                            | EPR6573    | Rabbit          | 1:200                             |
|                                     | CD45R          | Receptor-type tyrosine-protein phosphatase<br>C               | Abcam #64100                                                                               | RA3-6B2    | Rat             | 1:200                             |
|                                     | CD163          | Scavenger receptor cysteine-rich type 1<br>protein M130       | Leica #CD163-L-CE                                                                          | 10D6       | Mouse           | 1:500                             |
|                                     | CLEC4F         | C-type lectin domain; family 4, member F                      | R&D Systems #MAB2784                                                                       | 370901     | Rat             | 1:1,000                           |
|                                     | CK19           | Cytokeratin 19                                                | TROMA-III was deposited to the<br>DSHB by Kemler, R. (DSHB<br>Hybridoma Product TROMA-III) | TROMA-III  | Rat             | 1:200                             |
|                                     | Coll-I         | Collagen-I (mouse)                                            | Abcam #ab21286                                                                             | polyclonal | Rabbit          | 1:200                             |
|                                     | Coll-I         | Collagen I (human)                                            | Abcam #ab34710                                                                             | polyclonal | Rabbit          | 1:200                             |
|                                     | Desmin         | Desmin                                                        | Abcam #ab15200                                                                             | polyclonal | Rabbit          | 1:200                             |
|                                     | IL-17          | Interleukin-17A                                               | R&D Systems #AF-317-NA                                                                     | polyclonal | Goat            | 1:200                             |
|                                     | IBA1           | Ionized calcium binding adaptor molecule 1                    | EMD Millipore #MABN92                                                                      | 20A12.1    | Mouse           | 1:1,000                           |
|                                     | IBA1           | Ionized calcium binding adaptor molecule 1                    | VWR #100369-764                                                                            | polyclonal | Rabbit          | 1:1,000                           |
|                                     | Na:K ATPase    | Anti-alpha 1 Sodium Potassium ATPase                          | Abcam #ab7671                                                                              | 464.6      | Mouse           | 1:200                             |
|                                     | PCNA           | Proliferating cell nuclear antigen                            | Abcam #ab29                                                                                | PC10       | Mouse           | 1:10,000                          |
|                                     | panCK          | Wide spectrum Cytokeratin                                     | Abcam #ab9377                                                                              | polyclonal | Rabbit          | 1:500                             |
|                                     | PD-1           | Programmed cell death protein 1                               | R&D Systems #AF1021                                                                        | polyclonal | Goat            | 1:200                             |
|                                     | PLIN2          | Perilipin-2                                                   | Abcam #ab52356                                                                             | polyclonal | Rabbit          | 1:200                             |
|                                     | S100a9         | S100 calcium binding protein A9                               | Abcam #ab63818                                                                             | polyclonal | Rabbit          | 1:5,000                           |
| Target Species                      |                | Fluorochromes                                                 | Manufacturer and Catalog #                                                                 | Clone #    | Host<br>Species | Antibody Dilution<br>in PBS+1%BSA |
| <b>Secondary<br/>Antibodies</b>     | Mouse IgG      | Alexa Fluor® 488                                              | Cell Signaling #4408S                                                                      | polyclonal | Goat            | 1:500                             |
|                                     |                | Alexa Fluor® 647                                              | Cell Signaling #4410S                                                                      | polyclonal | Goat            | 1:500                             |
|                                     |                | Amplification kit, DyLight® 488                               | Vector #DK-2488                                                                            | polyclonal | Goat/Horse      | RTU                               |
|                                     | Rabbit IgG     | Alexa Fluor® 488                                              | Cell Signaling #4412S                                                                      | polyclonal | Goat            | 1:500                             |
|                                     |                | Alexa Fluor® 555                                              | Cell Signaling #4413S                                                                      | polyclonal | Goat            | 1:500                             |
|                                     |                | Alexa Fluor® 647                                              | Cell Signaling #4414S                                                                      | polyclonal | Goat            | 1:500                             |
|                                     |                | Amplification kit, DyLight® 488                               | Vector #DK-1488                                                                            | polyclonal | Goat/Horse      | RTU                               |
|                                     | Rat IgG        | Alexa Fluor® 555                                              | Cell Signaling #4417S                                                                      | polyclonal | Goat            | 1:500                             |
|                                     |                | Alexa Fluor® 647                                              | Cell Signaling #4418S                                                                      | polyclonal | Goat            | 1:500                             |
|                                     | Goat IgG       | CF™750                                                        | Merck #SAB4600444-125UL                                                                    | polyclonal | Donkey          | 1:500                             |

Abbreviations: BSA: Bovine serum albumin, CD: Cluster of differentiation, IgG: Immunoglobulin G, PBS: Phosphate-buffered saline, RTU: Ready-to-use.



## Supplementary Reference

1. Eliceiri, K.W.; Michael R.B.; Ilya, G.G.; Luis, I.; Manjunath, B.S.; Maryann, E.M.; Robert, F.M.; Hanchuan, P.; Anne, L.P.; Badrinath, R.; et al. Biological imaging software tools. *Nat. Methods*. **2012**, *9*, 697–710.
2. Guet, R.; Burri, O.; Seitz, A. in *Computer Optimized Microscopy: Methods and Protocols* (eds Elena Rebollo & Manel Bosch) 23–37 (Springer New York, 2019).
3. Corrigan, A.M.; Karlsson, J.; Wildenhain, J.; Knerr, L.; Halvarsson, M.O.; Karlsson, M.; Lünse, S.; Wang, Y. IA-Lab: A MATLAB framework for efficient microscopy image analysis development, applied to quantifying intracellular transport of internalized peptide-drug conjugate *PLoS One*. **2019**, *14*, e0220627, doi:10.1371/journal.pone.0220627.
4. Lopes, A.; Billard, E.; Casse, A.; Villéger, R.; Veziant, J.; Roche, G.; Carrier, G.; Sauvanet, P.; Briat, A.; Pagès, F. Deciphering the immune microenvironment of a tissue by digital imaging and cognition network *Sci Rep*. **2018**, *8*, 16692, doi:10.1038/s41598-018-34731-x.
5. Parra, E. R.; Francisco-Cruz, A.; Wistuba, I.I. State-of-the-Art of Profiling Immune Contexture in the Era of Multiplexed Staining and Digital Analysis to Study Paraffin Tumor Tissues *Cancers (Basel)*. **2019**, *11*, 247, doi:10.3390/cancers11020247.

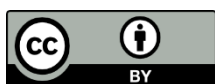

© 2020 by the authors. Licensee MDPI, Basel, Switzerland. This article is an open access article distributed under the terms and conditions of the Creative Commons Attribution (CC BY) license (<http://creativecommons.org/licenses/by/4.0/>).
